# Supplementary material
Source: PubMed Central journal article supplement (PMC3490583)
Supplement: supp_pp.112.204180_204180revSupplemental_Figures_and_Tables.pdf [file supp_pp.112.204180_204180revSupplemental_Figures_and_Tables.pdf]

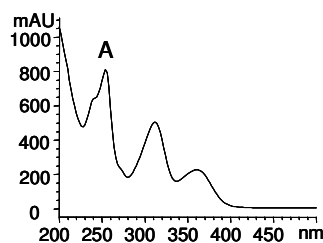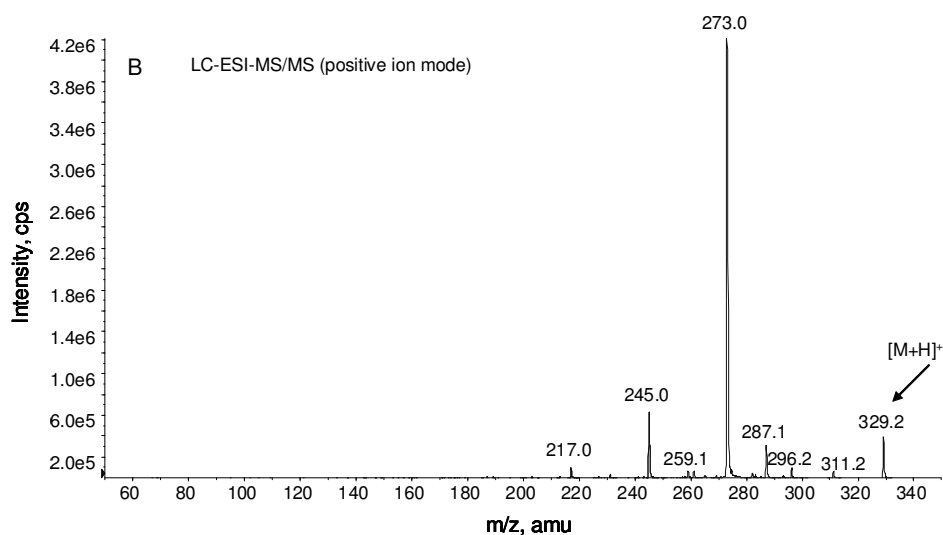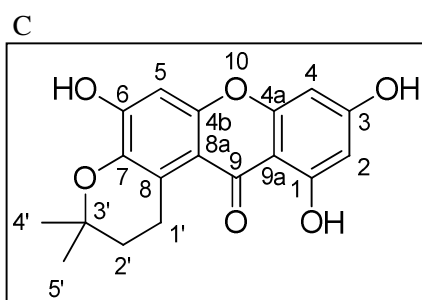

| position | $^1\text{H}$ ( $\delta_{\text{H}}$ ) | $^{13}\text{C}$ ( $\delta_{\text{C}}$ ) |
|----------|--------------------------------------|-----------------------------------------|
| 1        | -                                    | 164.70                                  |
| 2        | 6.20 [1H, d, 2.2 Hz]                 | 98.56                                   |
| 3        | -                                    | 165.20                                  |
| 4        | 6.33 [1H, d, 2.2 Hz]                 | 93.74                                   |
| 4a       | -                                    | 158.05*                                 |
| 4b       | -                                    | 154.22*                                 |
| 5        | 6.79 [1H, s]                         | 101.48                                  |
| 6        | -                                    | 154.00*                                 |
| 7        | -                                    | 139.97                                  |
| 8        | -                                    | 122.34                                  |
| 8a       | -                                    | 111.30                                  |
| 9        | -                                    | 183.13                                  |
| 9a       | -                                    | 103.84                                  |
| 1'       | 3.48 [2H, t, 6.8 Hz]                 | 23.17                                   |
| 2'       | 1.90 [2H, t, 6.8 Hz]                 | 33.21                                   |
| 3'       | -                                    | 75.33                                   |
| 4', 5'   | 1.37 [6H, s]                         | 26.43                                   |

**Figure S1.** UV (A), MS (B), and  $^1\text{H}$  and  $^{13}\text{C}$  NMR data (C) of hyperxanthone E isolated from elicitor-treated *H. calycinum* cell cultures.

\* These chemical shifts are interchangeable.

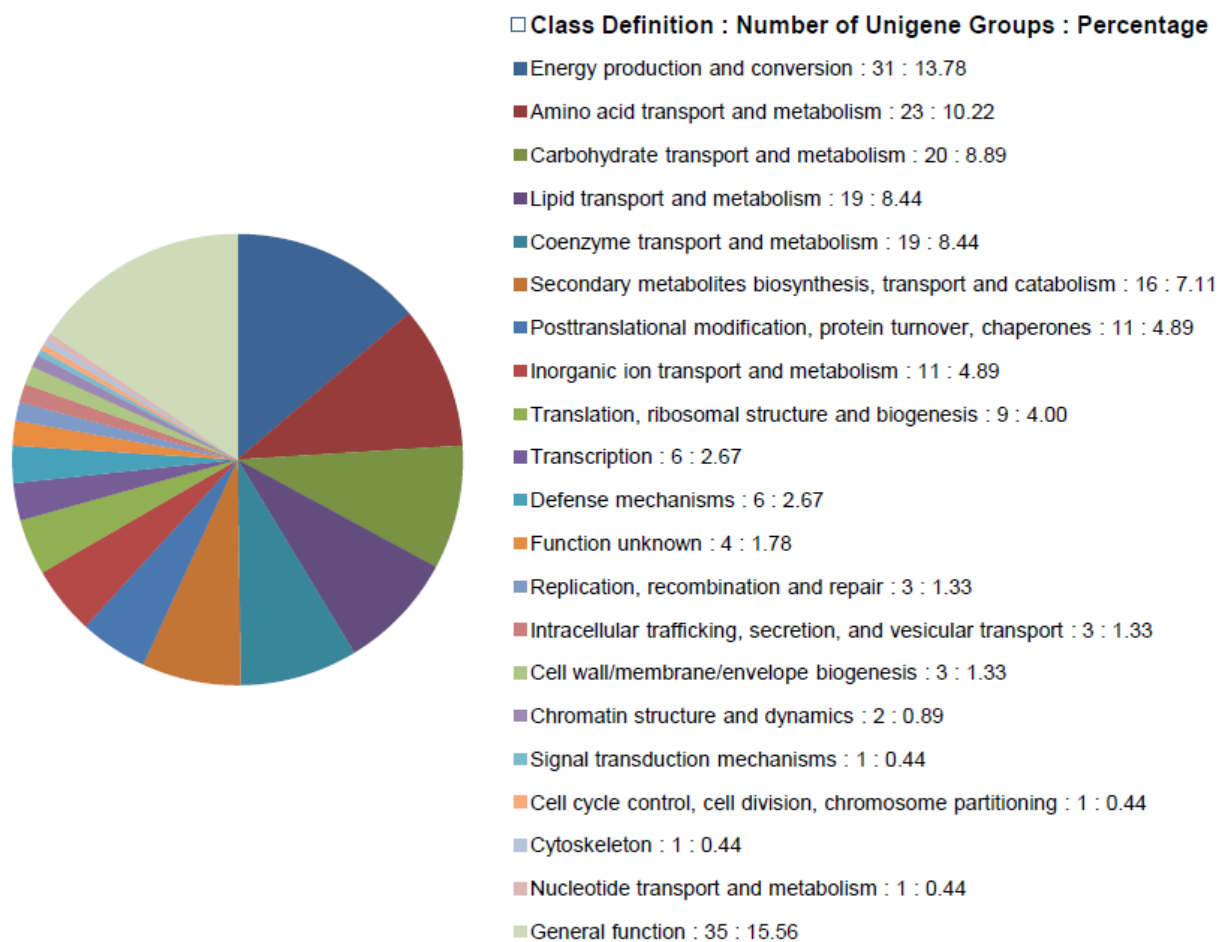

**Figure S2.** Proposed metabolic roles of differentially expressed unigenes from a subtracted cDNA library of *H. calycinum*.

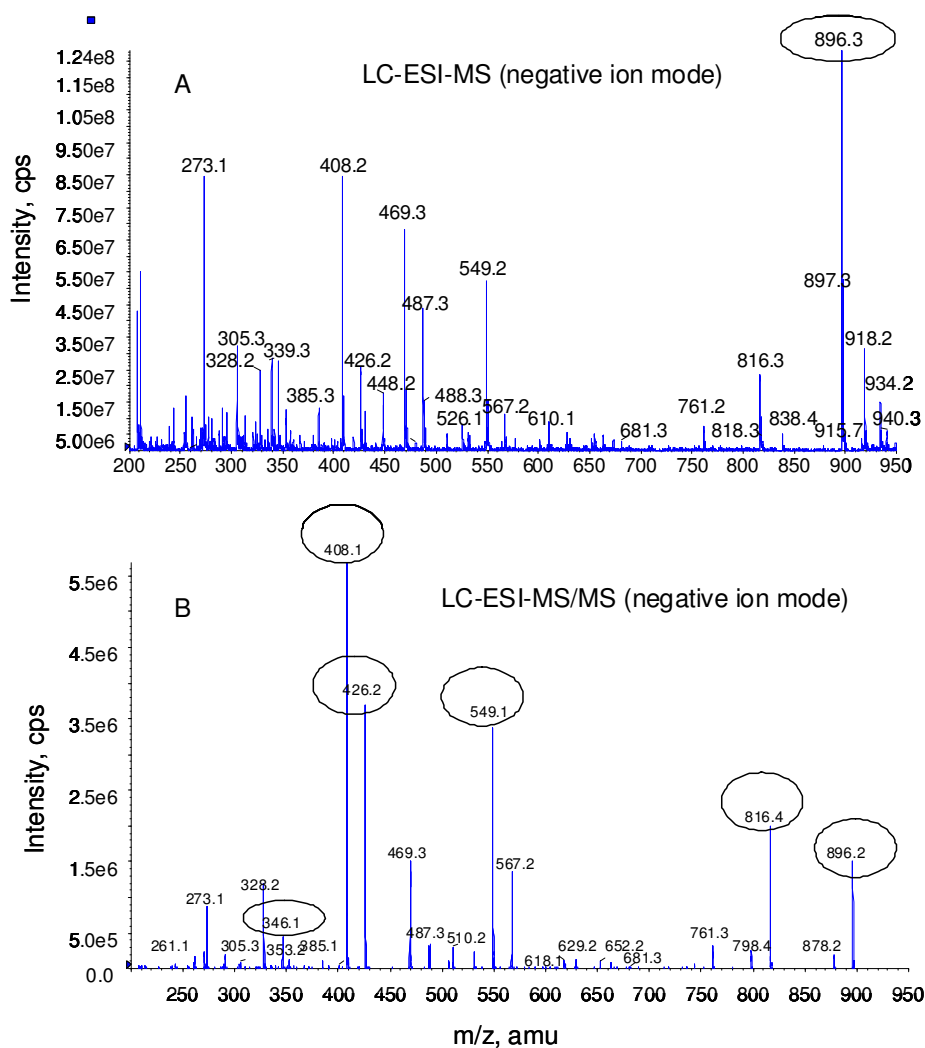

**Figure S3.** LC-ESI-MS analysis of CNL-formed cinnamoyl-CoA represented in the mass spectrum A by the molecular ion  $[M-H]^-$  at  $m/z$  896.3. This singly charged cinnamoyl-CoA ion was selected for further fragmentation and the product ions were recorded in negative ion mode (B). MS/MS analysis showed characteristic fragments of CoA and phosphoadenosine-containing compounds, such as  $[AMP-H]^-$  at  $m/z$  346.3,  $[ADP-H]^-$  at  $m/z$  426.2, and  $[ADP-H_2O-H]^-$  at  $m/z$  408.2, together with fragments containing parts of the cinnamoyl moiety, such as  $[M-H_2PO_3]^-$  at  $m/z$  816.2 and  $[M-AMP-H]^-$  at  $m/z$  549.2.

**Table SI.** Accession numbers of amino acid sequences used for phylogenetic reconstruction

| Sequence                                                    | Accession No. |
|-------------------------------------------------------------|---------------|
| <i>Capsicum annuum</i> 4CL                                  | AAG43823      |
| <i>Nicotiana tabacum</i> 4CL1                               | O24145        |
| <i>Solanum tuberosum</i> 4CL1                               | P31684        |
| <i>Solanum tuberosum</i> 4CL2                               | P31685        |
| <i>Nicotiana tabacum</i> 4CL                                | AAB18638      |
| <i>Nicotiana tabacum</i> 4CL2                               | O24146        |
| <i>Vanilla planifolia</i> 4CL                               | O24540        |
| <i>Petroselinum crispum</i> 4CL1                            | P14913        |
| <i>Scutellaria baicalensis</i> 4CL                          | BAD90936      |
| <i>Salvia miltiorrhiza</i> 4CL2                             | AAP68991      |
| <i>Arabidopsis thaliana</i> 4CL1                            | NP_001077697  |
| <i>Arabidopsis thaliana</i> 4CL2                            | NP_188761     |
| <i>Ruta graveolens</i> 4CL2                                 | ABY60843      |
| <i>Populus trichocarpa</i> x <i>deltoids</i> 4 CL3          | AAK58908      |
| <i>Sorbus aucuparia</i> 4CL1                                | ADF30254      |
| <i>Rubus idaeus</i> 4CL1                                    | AAF91310      |
| <i>Medicago truncatula</i> 4CL                              | XP_003637266  |
| <i>Glycine max</i> 4CL1                                     | NP_001236418  |
| <i>Amorpha fruticosa</i> 4CL                                | AAL35216      |
| <i>Sorbus aucuparia</i> 4CL2                                | ADE96996      |
| <i>Rubus idaeus</i> 4CL2                                    | AAF91309      |
| <i>Populus trichocarpa</i> x <i>deltoids</i> 4CL2           | AAC39365      |
| <i>Populus trichocarpa</i> x <i>deltoids</i> 4CL1           | AAC39366      |
| <i>Salvia miltiorrhiza</i> 4CL1                             | AAP68990      |
| <i>Physcomitrella patens</i> 4CL1 <sup>a</sup>              | ABY21312      |
| <i>Physcomitrella patens</i> 4CL4 <sup>a</sup>              | ABY21315      |
| <i>Physcomitrella patens</i> 4CL2 <sup>a</sup>              | ABY21313      |
| <i>Physcomitrella patens</i> 4CL3 <sup>a</sup>              | ABY21314      |
| <i>Selaginella moellendorffii</i> 4CL <sup>b</sup>          | EFJ29005      |
| <i>Pinus radiata</i> 4CL <sup>c</sup>                       | ACF35279      |
| <i>Pinus taeda</i> 4CL <sup>c</sup>                         | AAB42383      |
| <i>Pinus massoniana</i> 4CL <sup>c</sup>                    | ACO40513      |
| <i>Nothotsuga longibracteata</i> 4CL <sup>c</sup>           | AAF74016      |
| <i>Tsuga Canadensis</i> 4CL <sup>c</sup>                    | AAF74019      |
| <i>Abies beshanzuensis</i> 4CL <sup>c</sup>                 | AAF74014      |
| <i>Larix gmelinii</i> var. <i>Olgensis</i> 4CL <sup>c</sup> | AAQ05330      |
| <i>Pseudotsuga menziesii</i> 4CL <sup>c</sup>               | AAQ05340      |
| <i>Picea wilsonii</i> 4CL <sup>c</sup>                      | ADC97166      |
| <i>Lolium perenne</i> 4CL1                                  | AAF37732      |
| <i>Arabidopsis thaliana</i> 4CL3                            | NP_849844     |
| <i>Ruta graveolens</i> 4CL1                                 | ABY60842      |
| <i>Lithospermum erythrorhizon</i> 4CL                       | BAA08366      |

| Sequence (continued)                              | Accession No. |
|---------------------------------------------------|---------------|
| <i>Agastache rugosa</i> 4CL                       | AAT02218      |
| <i>Glycine max</i> 4CL2                           | NP_001236236  |
| <i>Glycine max</i> 4CL4                           | CAC36095      |
| <i>Glycine max</i> 4CL3                           | AAC97389      |
| <i>Camellia sinensis</i> 4CL                      | ABA40922      |
| <i>Populus trichocarpa</i> x <i>deltoids</i> 4CL4 | AAK58909      |
| <i>Gossypium hirsutum</i> 4CL2                    | ACZ06243      |
| <i>Rubus idaeus</i> 4CL3                          | AAF91308      |
| <i>Sorbus aucuparia</i> 4CL3                      | ADE96997      |
| <i>Prunus avium</i> 4CL                           | ADZ54779      |
| <i>Oryza sativa</i> 4CL                           | CAA36850      |
| <i>Neosinocalamus affinis</i> 4CL                 | ACA09448      |
| <i>Lolium perenne</i> 4CL2                        | AAF37733      |
| <i>Lolium perenne</i> 4CL3                        | AAF37734      |
| <i>Panicum virgatum</i> 4CL1                      | ACD02135      |
| <i>Cenchrus purpureus</i> 4CL                     | AEW12812      |
| <i>Zea mays</i> 4CL                               | AAS67644      |
| <i>Medicago truncatula</i> OSBZL1                 | XP_003600627  |
| <i>Hypericum calycinum</i> CNL                    | AFS60176      |
| <i>Petunia hybrida</i> CNL                        | AEO52693      |
| <i>Arabidopsis thaliana</i> CNL                   | Q9SS01        |
| <i>Brassica rapa</i> subsp. <i>Pekinensis</i> BZL | ACR10278      |
| <i>Clarkia breweri</i> BZL/CNL                    | AEO52695      |
| <i>Medicago truncatula</i> OSBZL2                 | XP_003610946  |
| <i>Medicago truncatula</i> OSBZL3                 | XP_003610948  |
| <i>Medicago truncatula</i> OSBZL4                 | XP_003629166  |
| <i>Medicago truncatula</i> OSBZL5                 | XP_003609738  |
| <i>Medicago truncatula</i> OSBZL6                 | XP_003616111  |
| <i>Glycine max</i> OSBZL1                         | XP_003518357  |
| <i>Glycine max</i> OSBZL2                         | XP_003544347  |
| <i>Medicago truncatula</i> OSBZL7                 | XP_003616110  |
| <i>Medicago truncatula</i> OSBZL8                 | XP_003616108  |
| <i>Arabidopsis lyrata</i> fatty acid CL           | XP_002880289  |

<sup>a</sup>moss, <sup>b</sup>pteridophyte, <sup>c</sup>gymnosperm.
